# Supplementary material
Source: bioRxiv or medRxiv preprint supplement (https://www.biorxiv.org/highwire/filestream/22798/field_highwire_adjunct_files/5/081802-6.pdf)

**Color Key  
and Histogram**

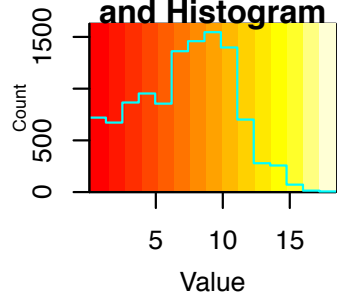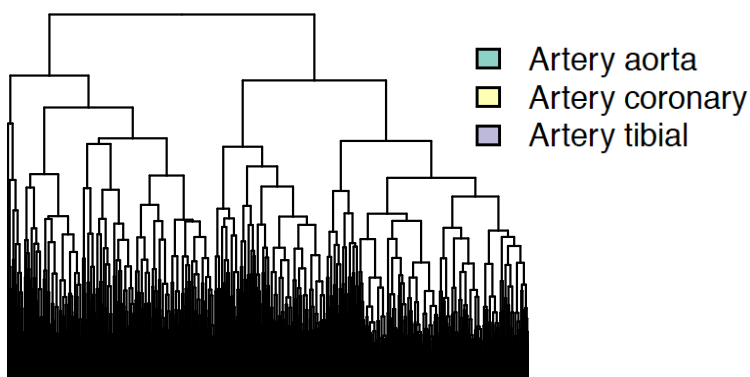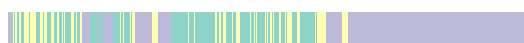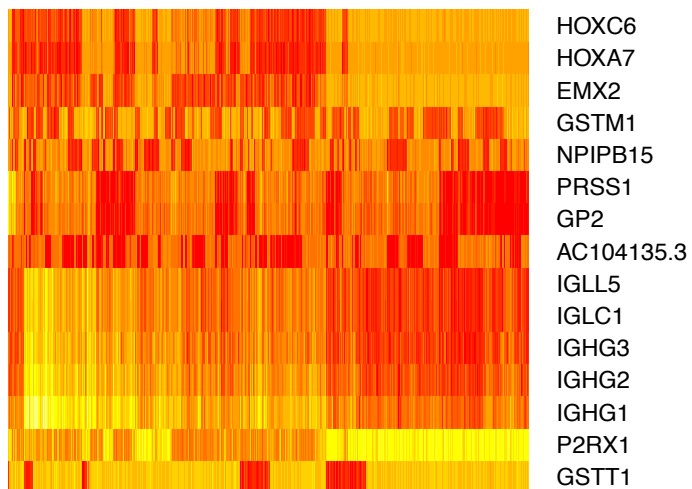

**Color Key  
and Histogram**

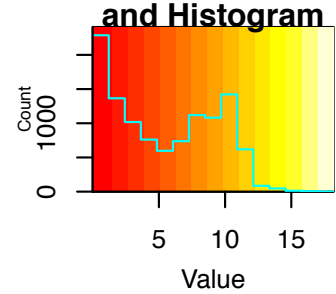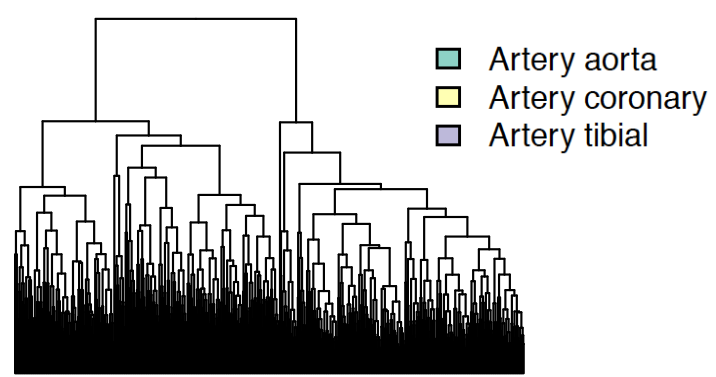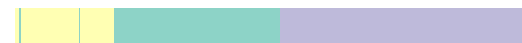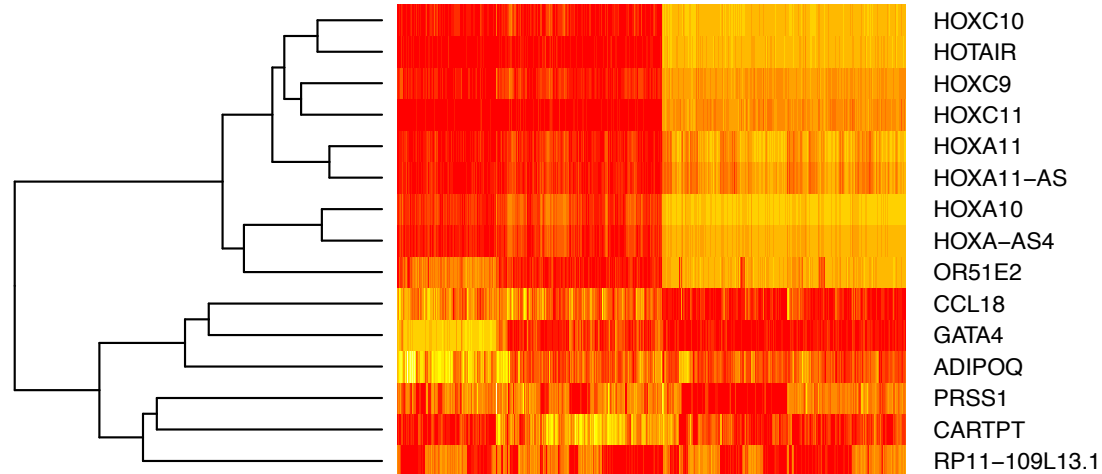

Supplement: Supplementary file [file 081802-6.pdf]
